# Supplementary material
Source: PubMed Central journal article supplement (PMC9124681)

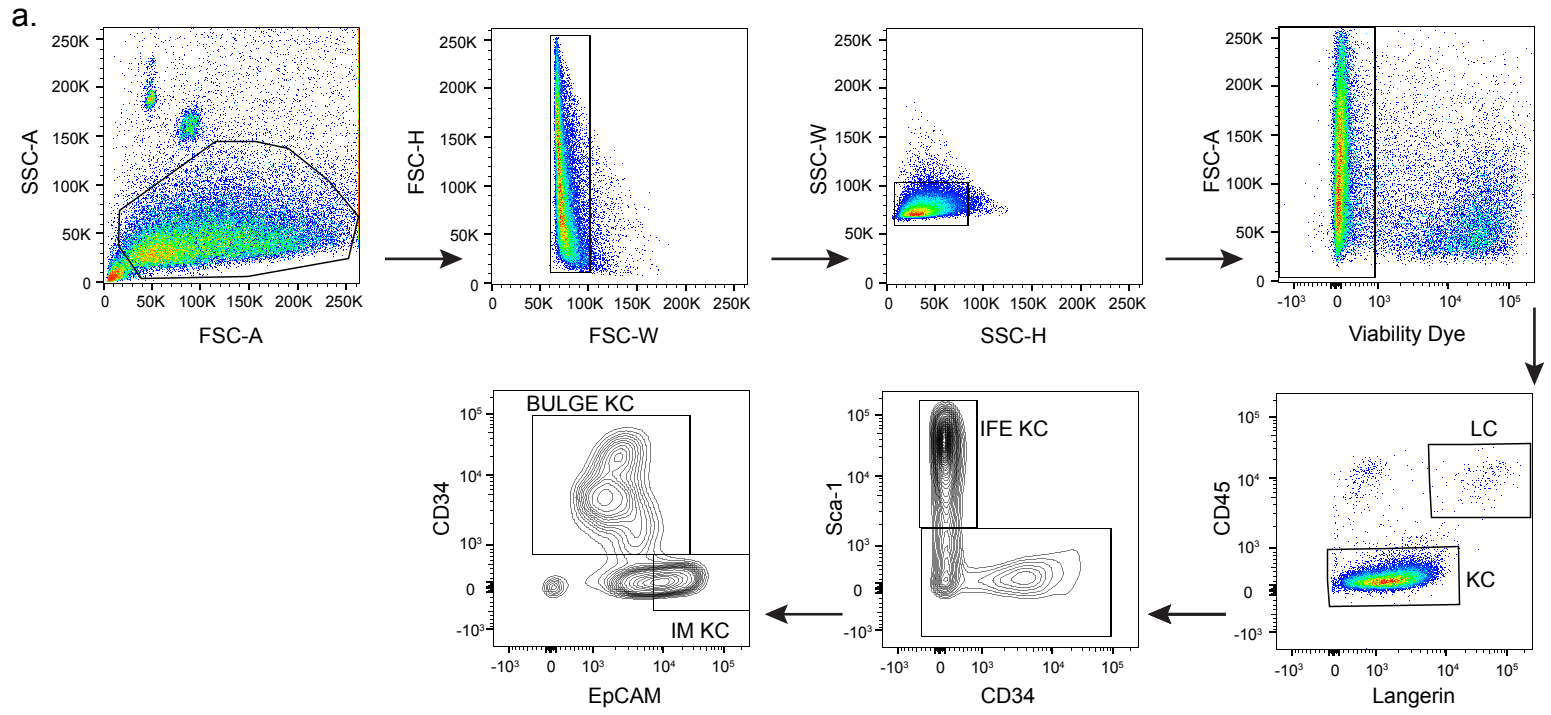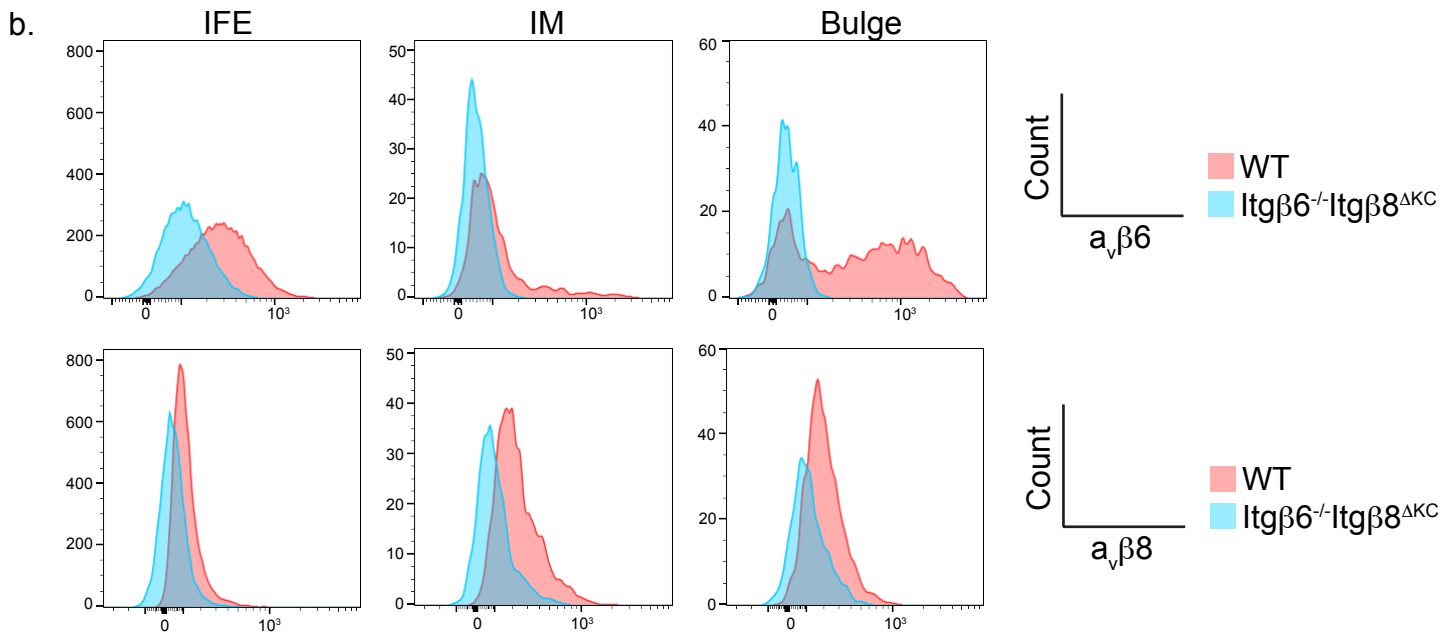

Supplement: NIHMS1775897-supplement-1.pdf [file NIHMS1775897-supplement-1.pdf]
